# Supplementary material
Source: MDPI journal article supplement (https://www.mdpi.com/2077-0472/12/1/103)
Supplement: s1 [file s1]

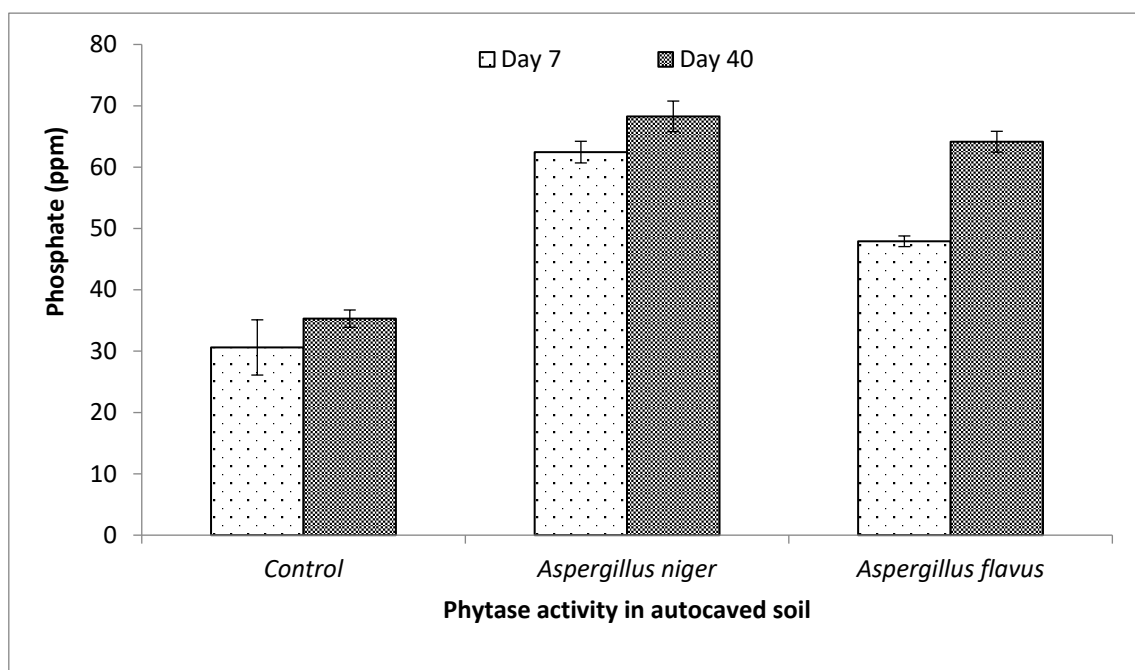

**Figure S1.** Effects of crude phytase enzymes of *Aspergillus niger* and *Aspergillus flavus* on phosphate mineralization in sterilized garden soil under room conditions.

**Table S1.** characteristic morphological features of fungal strains based on colony appearance and microscopic structures.

| Name of fungal strains                                    | Colony colour                                | Colony Edges                                                 | Colony Size mm     | Stipes Color                                                                  | Stipes Surface | Conidiophore Surface                                     | Conidia Surface                                                                       |
|-----------------------------------------------------------|----------------------------------------------|--------------------------------------------------------------|--------------------|-------------------------------------------------------------------------------|----------------|----------------------------------------------------------|---------------------------------------------------------------------------------------|
| <i>Aspergillus niger</i><br>( <i>A. niger</i> )           | Black to dark brown                          | White to cream thick mat of floccose. Formed radial furrows. | 50-70mm            | Dark brown                                                                    | Smooth         | smooth and colorless.                                    | Conidia biseriate dark brown in colour.                                               |
| <i>Aspergillus flavus</i><br>( <i>A. flavus</i> )         | Yellow green with white mycelia at the edges | sporulation rings                                            | 50-65mm            | Pale brown roughed texture and colourless                                     | Spherical      | Rough shape and colorless.                               | Conidia Rough texture and colorless. 3.5 - 5 $\mu$ m; globose; smooth to finely rough |
| <i>Aspergillus fumigatus</i> .<br>( <i>A. fumigatus</i> ) | greenish grey                                | Hyline                                                       | 55-60mm<br>30-40mm | spaulate to clavate, phialides covering half to three quarter of the vesicle; | smooth         | 240 - 390 $\times$ 3.8 – 5.5 $\mu$ m smooth              | Conidia 2 - 3 $\mu$ m, globose finely rough and plain green.                          |
| <i>Aspergillus ficuum</i><br>( <i>A.ficuum</i> )          | Black                                        | Hyline                                                       | 40-50mm            | Light yeellow                                                                 | Smooth         | 100um-150umx 100 hyline                                  | Conidia 3.0-4.0um                                                                     |
| <i>Aspergillus oryzae</i><br>( <i>A. oryzae</i> )         | Pale yellow or Yellowish brown               | Yellowis brown                                               | 40-80mm            | Colourless                                                                    | Smooth surface | 20-40 $\times$ 3-6um, globose.                           | 4-5um smooth                                                                          |
| <i>Aspergillus nidulan</i><br>( <i>A. nidulans</i> )      | Dark green                                   | brown exudates                                               | 50-70mm            | Brown                                                                         | Smooth surface | 35- 70 $\times$ 3-6 $\mu$ m; conidiophore small in size. | 3 - 4 $\mu$ m, green; spherical with smooth to slightly rough walls. biseriate        |

|                                                               |                                                                   |                                  |         |            |                     |                                                                                                    |                                                                                                                         |
|---------------------------------------------------------------|-------------------------------------------------------------------|----------------------------------|---------|------------|---------------------|----------------------------------------------------------------------------------------------------|-------------------------------------------------------------------------------------------------------------------------|
| <i>Aspergillus terreus</i><br>( <i>A. terreus</i> )           | dark green<br>with orange<br>to yellow                            | Brown to<br>purplish<br>exudates | 30-40mm | colourless | Smooth<br>surface   | 2.5–8 µm wide,<br>septate, hyaline,<br>acute angle<br>branching, tree-<br>or fan-like<br>branching | Small, round, hyaline<br>conidia ('accessory'<br>conidia) attached to<br>the vegetative hyphae                          |
| <i>Fusarium oxysporum</i><br>( <i>F. oxysporum</i> )          | woolly to<br>cottony with<br>cream to<br>white aerial<br>mycelium | cream colour                     | 12-25mm | -          | -                   | Monophialides                                                                                      | Phialides and<br>phialoconidia,<br>specific to the genus,<br>may be found in<br>closed tissue                           |
| <i>Fusarium solani</i><br>( <i>F. solani</i> )                | woolly to<br>cottony with<br>cream to<br>white aerial<br>mycelium | Cream colour                     | 12-25mm |            |                     | Monophialides.<br>Conidiophore<br>small<br>14-6µm x 2-4µm.                                         | Sporodochia.<br>Chlamydoconidia,ma<br>croconidia curved,<br>thick-walled three-<br>celled, 2-4x 5-10 µm                 |
| <i>Penicillium citrinum</i><br>( <i>P. citrinum</i> )         | Dark green<br>Pale                                                | Globulus,<br>smooth,             | 10-18mm | colourless | Biverticill<br>ate. |                                                                                                    | Conidia (2.0– 3.0 µm<br>dia.) globe spherical<br>and produced in well-<br>defined chains.                               |
| <i>Penicillium purourogenum</i><br>( <i>P. purourogenum</i> ) | 5mm dark<br>green with<br>brownish<br>reverse                     | Phialides                        | 5-8mm   |            |                     | Phialides of<br>conidiophor<br>called "penicilli"<br>conidiophore                                  | Arial and smooth<br>conidia 1.5-3µm<br>round, unicellular,<br>visualized<br>unbranching chains at<br>the tips           |
| <i>Rhizopus stolonifera</i><br>( <i>R. stolonifera</i> )      | white grey<br>to pale whit                                        |                                  | 60-70mm |            |                     | Sporangiophor,<br>globose,<br>ellipsoidal, and<br>angular 20-30µm.                                 | Sporingia(1.5µm to<br>3µm)<br>Unicellular round to<br>oven hyline to brown<br>in colour.                                |
| <i>Mucor rouxii</i><br>( <i>M. rouxii</i> )                   | White<br>initially and<br>becomes<br>grayish<br>brown.            |                                  | 20-50mm |            |                     | Sporangia are<br>round, 50-300<br>µm in diameter.                                                  | Sporangia are round,<br>50-300 µm in<br>diameter, gray to<br>black in color, and are<br>filled with<br>sporangiospores. |
